# Supplementary material for: Transcriptomic but not genomic variability confers phenotype of breast cancer stem cells
Source: Springer Nature journal article supplement (doi:10.1186/s40880-018-0326-8), 2018-09-19
Supplement: 40880_2018_326_MOESM7_ESM.pdf [file 40880_2018_326_MOESM7_ESM.pdf]

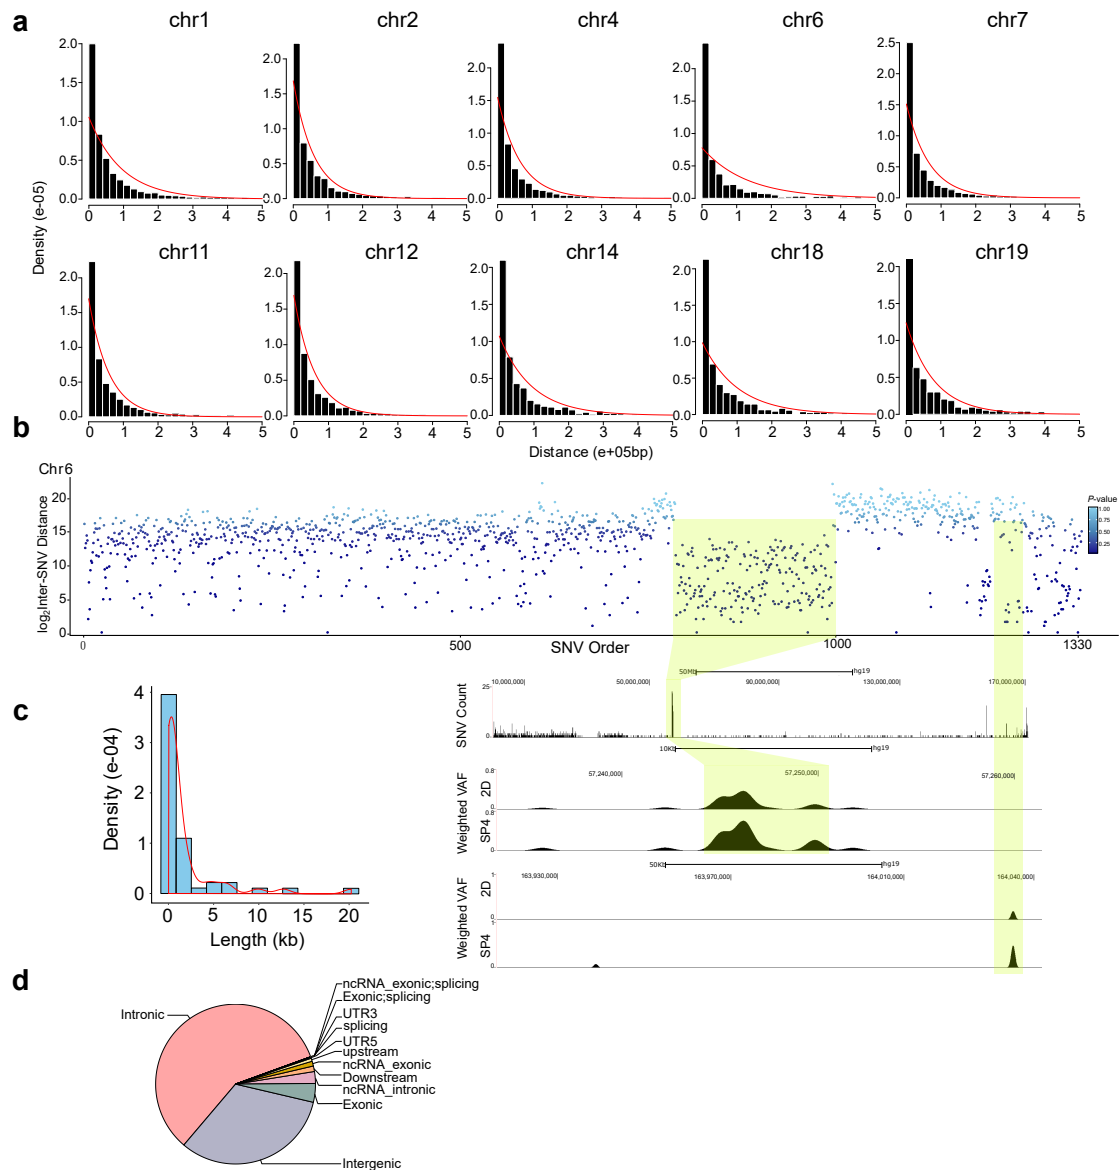

Fig. S1

**a**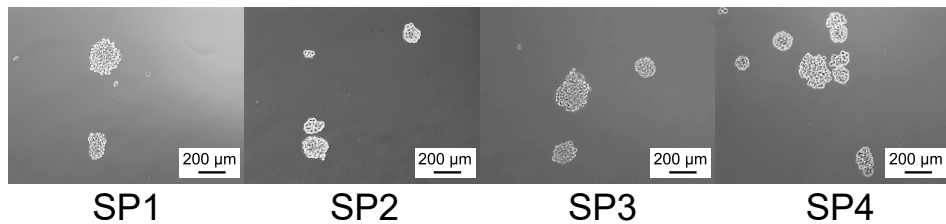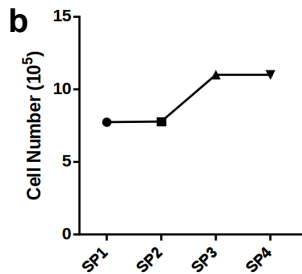**c**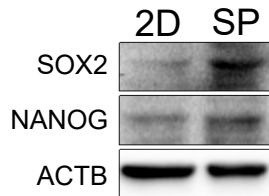

Fig. S2

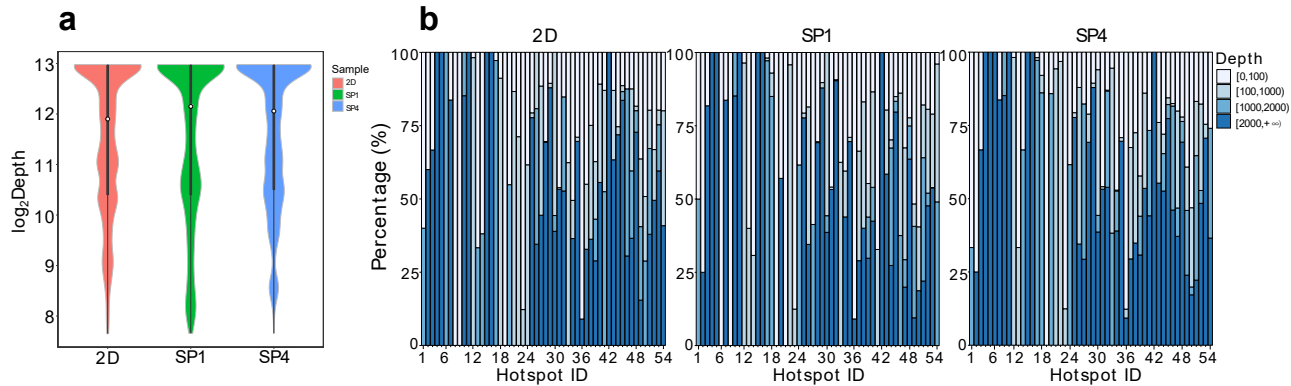

Fig. S3

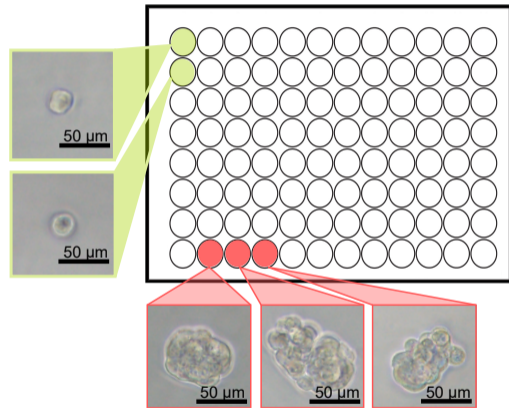

Fig. S4

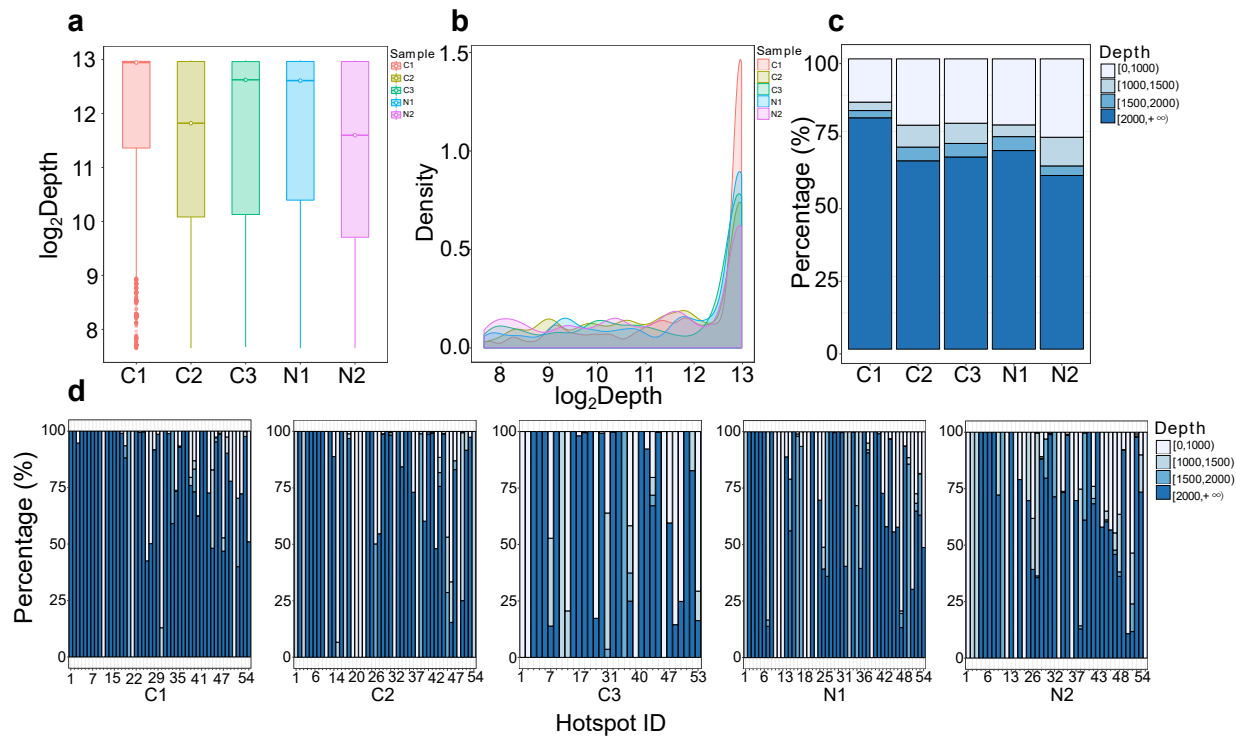

Fig. S5

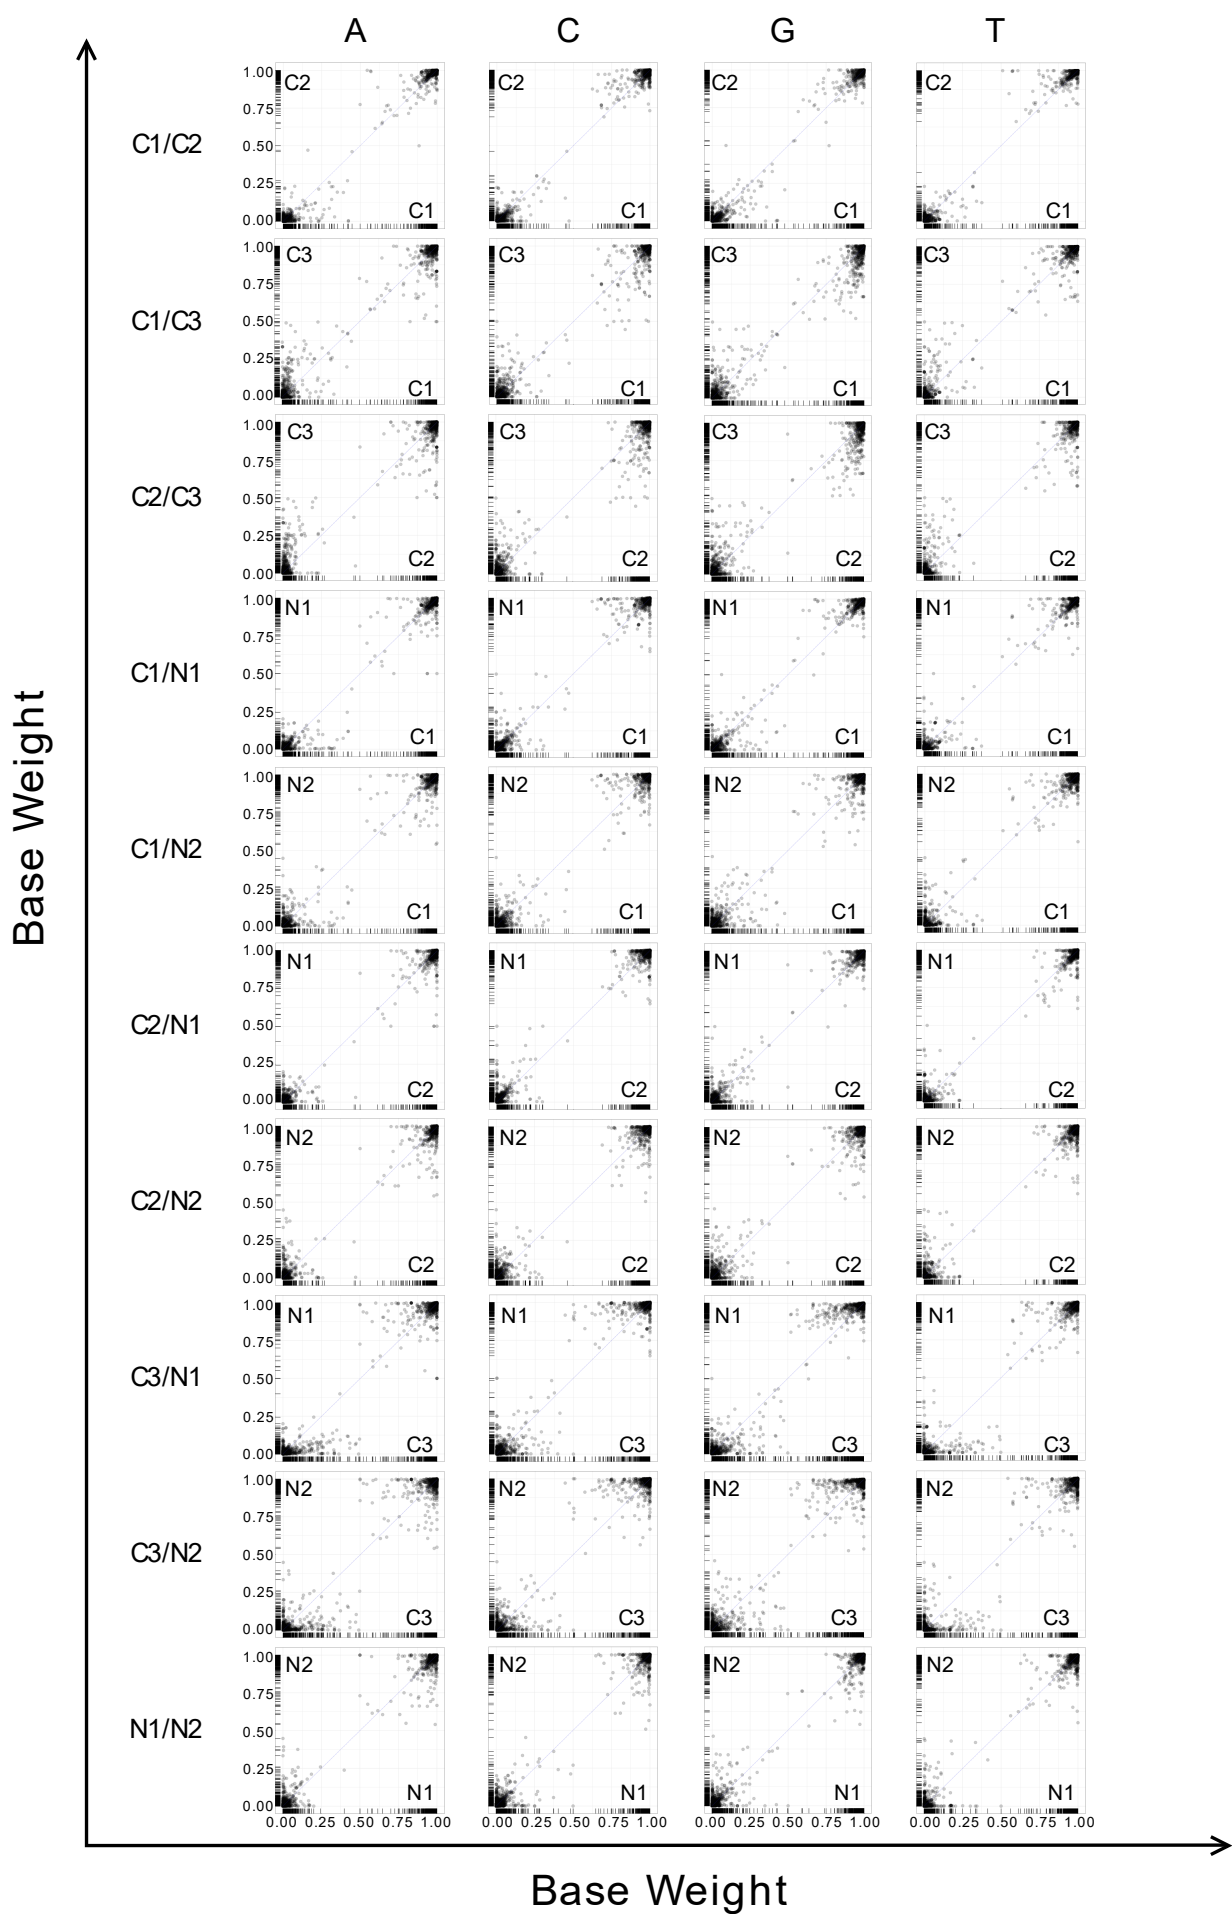

Fig. S6

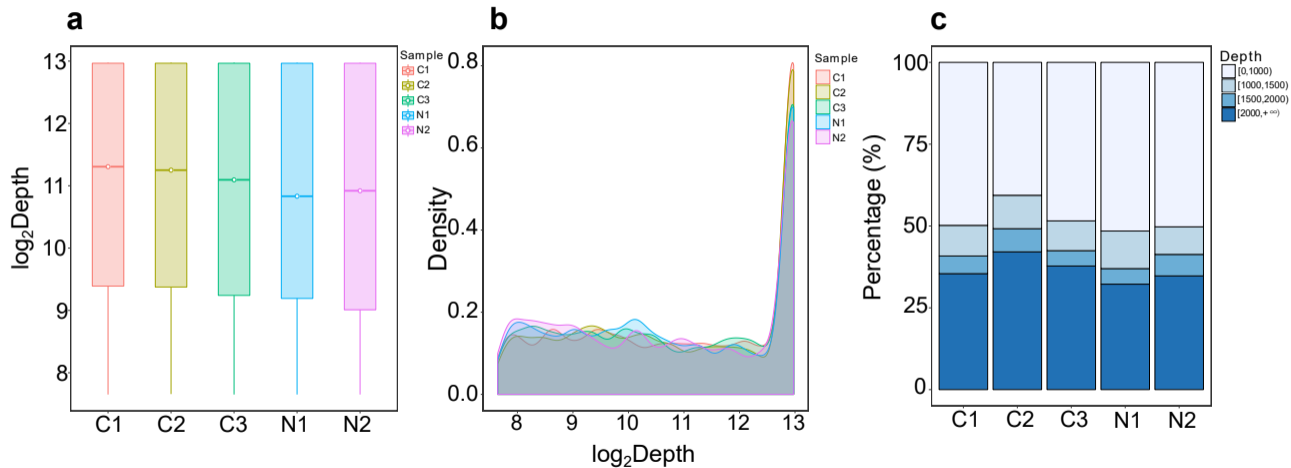

Fig. S7

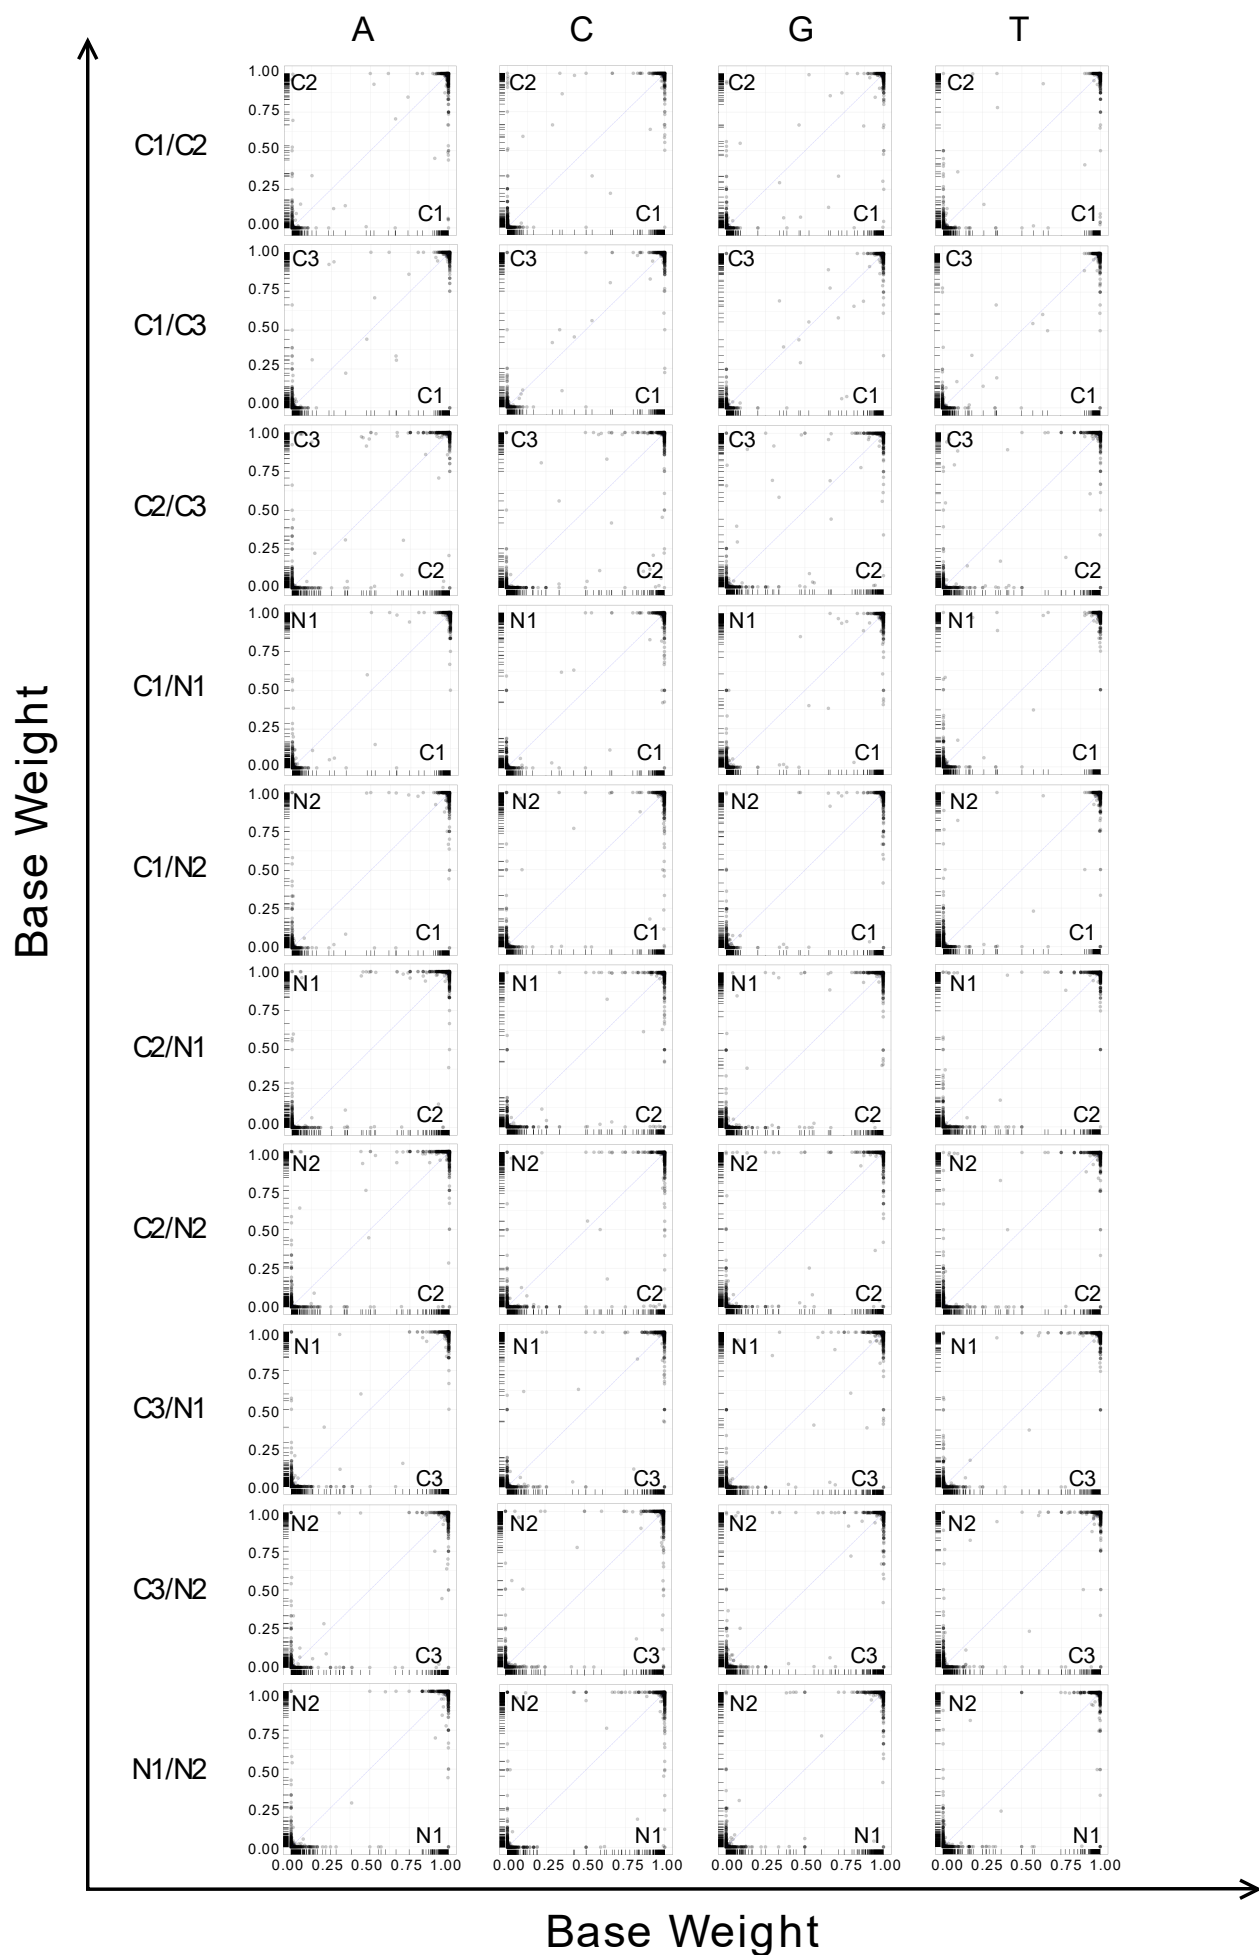

Fig. S8



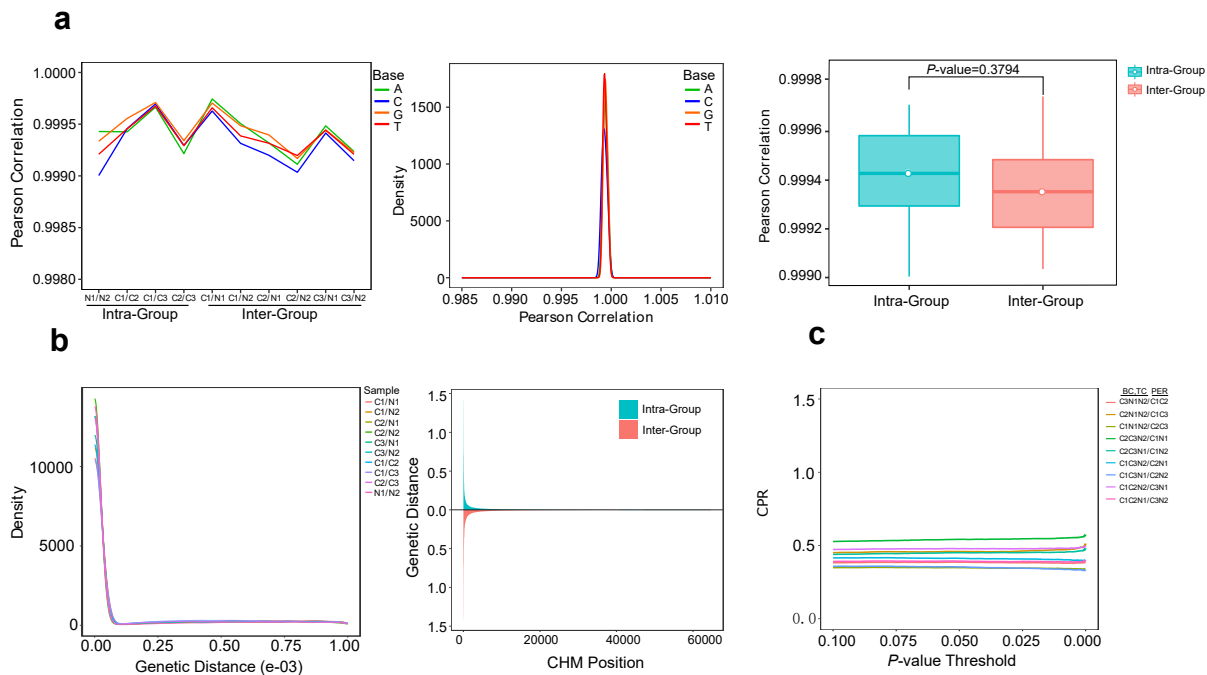

Fig. S9

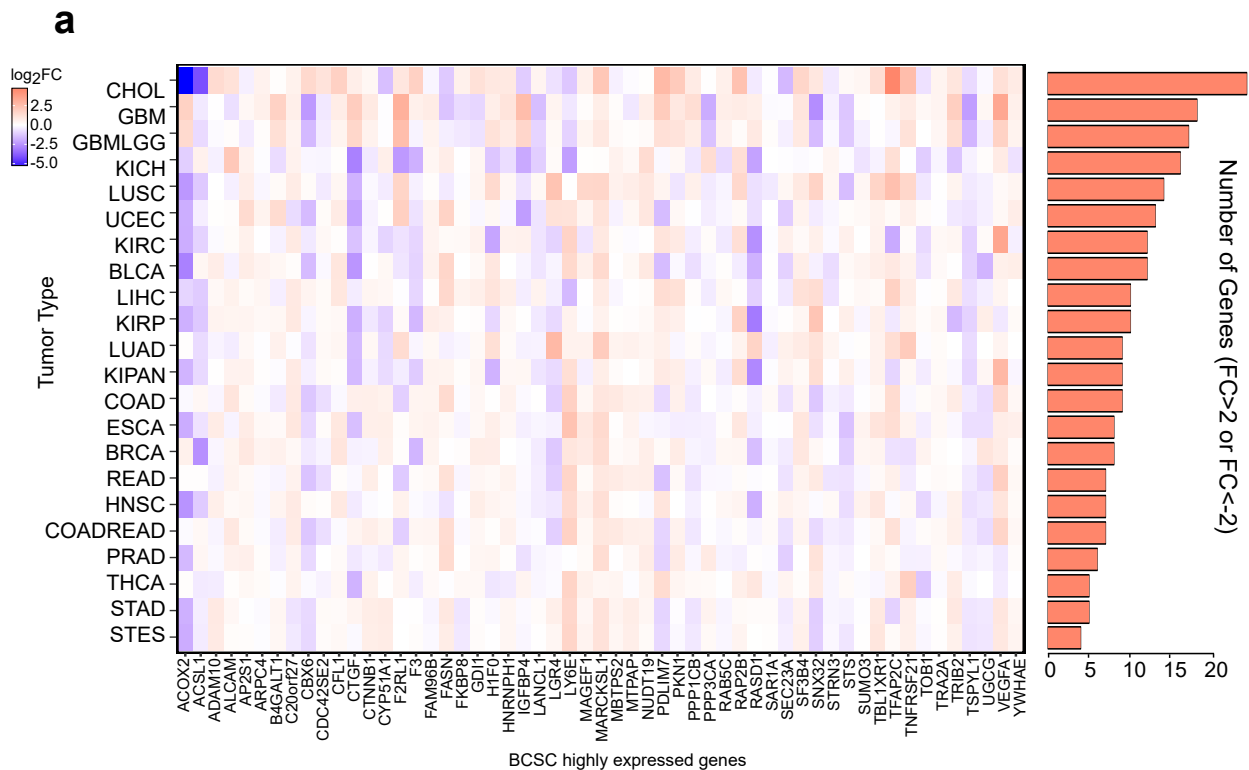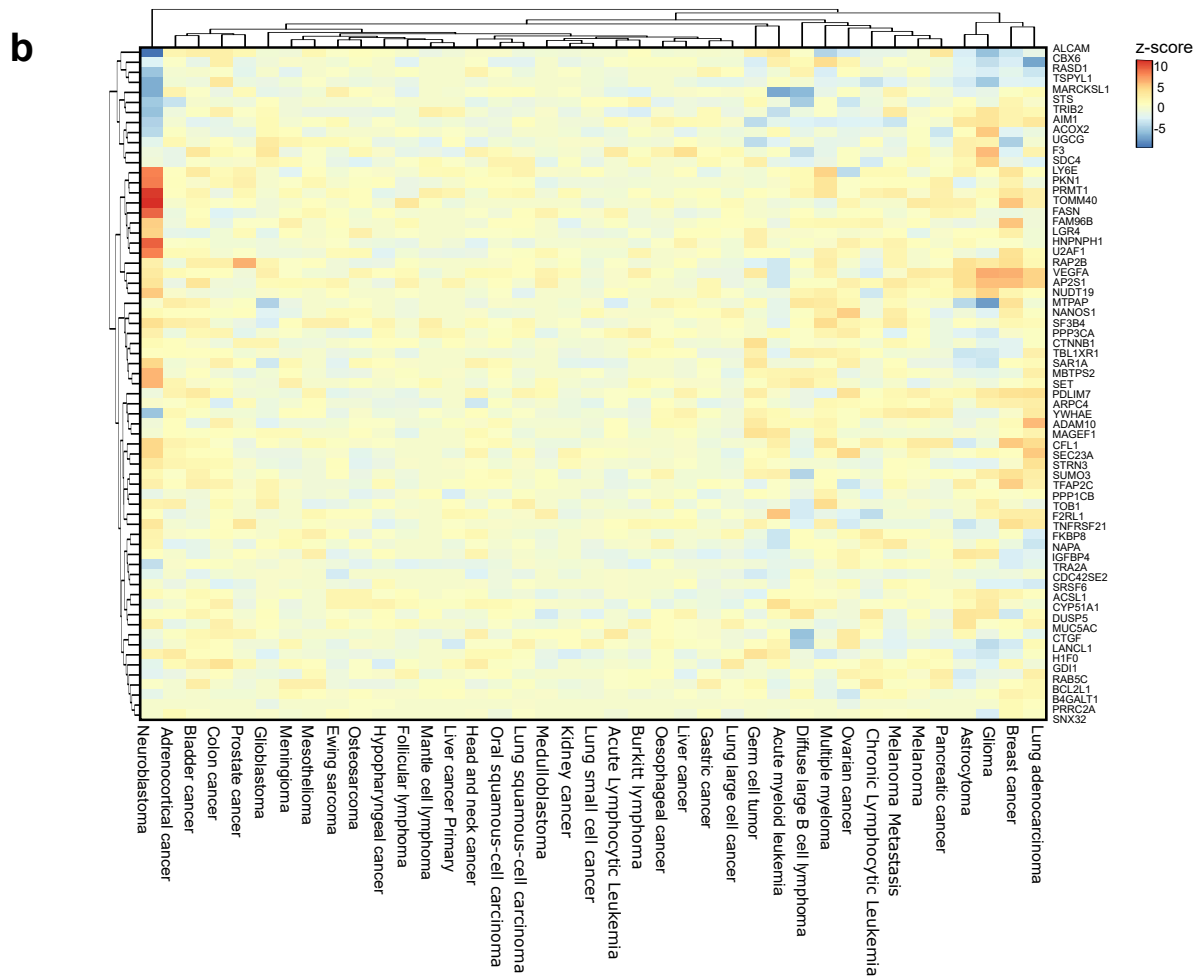

Fig. S10

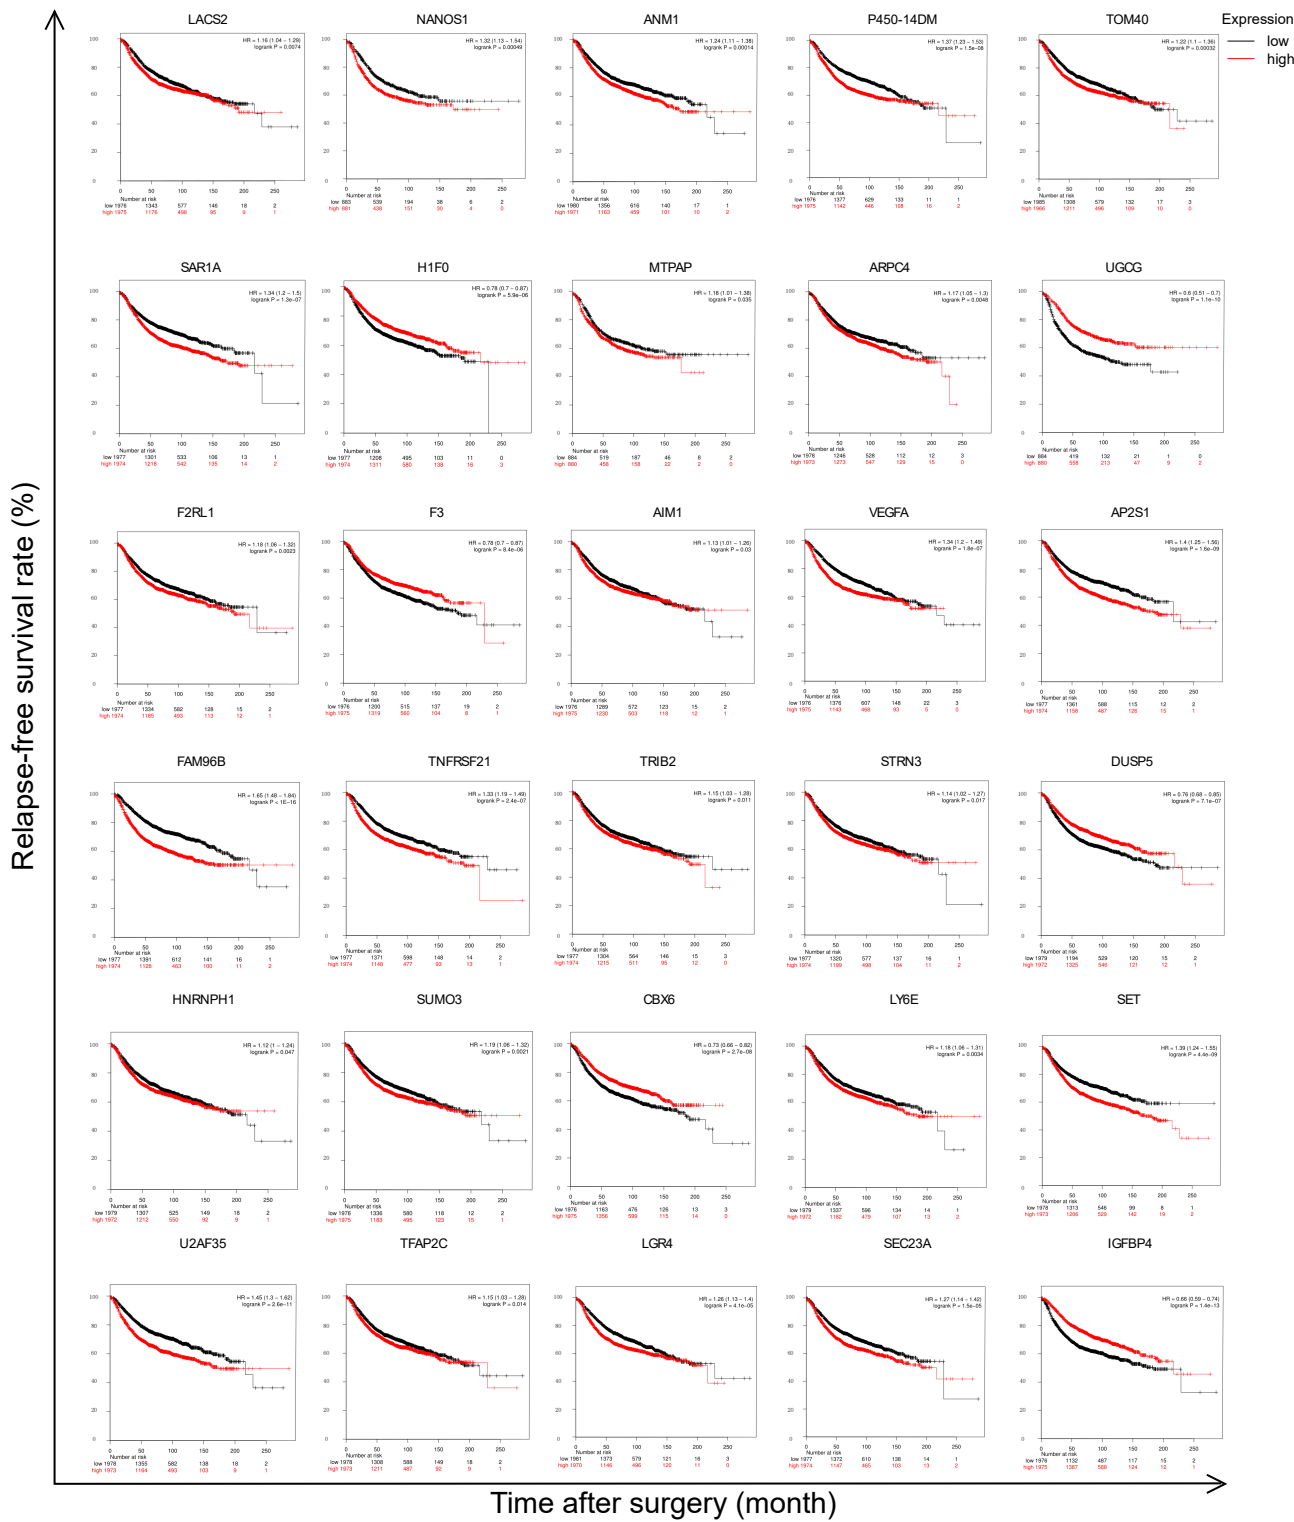

Fig. S11
